# Supplementary material for: An inter-atomic synergistic Co–Zn diatomic catalyst for efficient H2O2 electrosynthesis in neutral and alkaline media
Source: Royal Society of Chemistry journal article supplement (doi:10.1039/d4gc05661b), 2025-01-01
Supplement: d4gc05661b1.pdf [file d4gc05661b1.pdf]

## Supporting information

### **Inter-atomic synergistic Co-Zn diatomic catalyst for efficient H<sub>2</sub>O<sub>2</sub> electrosynthesis in neutral and alkaline media.**

Qiuyun Guo <sup>a,b,c</sup>, Fantao Kong <sup>\*b</sup>, Xu Yu <sup>b,c</sup>, Ningning Dai <sup>d</sup>, Qin Li <sup>b,c</sup>, Ping Wu <sup>b</sup>, Han Tian <sup>b</sup>, Kunming Song <sup>a,b</sup>, Wenping Sun <sup>e</sup>, Xiangzhi Cui <sup>\*a,b,c</sup>

<sup>a</sup> School of Chemistry and Materials Science, Hangzhou Institute for Advanced Study, University of Chinese Academy of Sciences, Hangzhou 310024, PR China.

<sup>b</sup> State Key Lab of High Performance Ceramics and Superfine Microstructure, Shanghai Institute of Ceramics, Chinese Academy of Sciences, Shanghai 200050, PR China

<sup>c</sup> Center of Materials Science and Optoelectronics Engineering, University of Chinese Academy of Sciences, Beijing 100049, PR China.

<sup>d</sup> Shanghai Motor Vehicle Inspection Certification & Tech Innovation Center Co., Ltd.

<sup>e</sup> School of Materials Science and Engineering, State Key Laboratory of Clean Energy Utilization, Zhejiang University, Hangzhou, 310027 P. R. China.

\*Email: cuixz@mail.sic.ac.cn (X. Cui).

## 1. Experimental Section

### 1.1 Materials

Melamine ( $C_3H_6N_6$ , 99%), Sulfur (S, 99%), Cobalt Phthalocyanine ( $C_{32}H_{16}CoN_8$ , 95%), Zinc Phthalocyanine ( $C_{32}H_{16}N_8Zn$ , 95%+), Potassium Sulfate ( $K_2SO_4$ ,  $\geq 99\%$ ), Cerium (IV) Sulfate ( $Ce(SO_4)_2$ , 99%+), Potassium hexacyanoferrate(III) ( $K_3Fe(CN)_6$ , 99%+) were purchased from Adamas Reagent Co. Ltd (Tansoole). Potassium Hydroxide (KOH,  $\geq 85\%$ ), Hydrochloric acid (HCl), N,N-Dimethylformamide ( $C_3H_7NO$ , 99.8%) were purchased from Chinese medicine reagent. All chemicals were used as received without any further purification.

### 1.2 Materials preparation

#### Synthesis of S- $C_3N_4$

Firstly, a specified quantity of melamine was placed into a porcelain receptacle and calcined in a muffle furnace at 550 °C in air for 2 h (heating rate of 2.3 °C/min), after which it was cooled to room temperature in order to obtain the light yellow g- $C_3N_4$ . Secondly, the g- $C_3N_4$  powder was subjected to ultrasonic protonation in a solution of 6 M HCl for one hour, followed by stirring for 4 h at room temperature. The acidic solution was then continuously washed with deionised water until the solution was neutral, after which it was dried in an oven to obtain the protonated layered g- $C_3N_4$ . Subsequently, equal masses of protonated g- $C_3N_4$  and singlet sulphur were added to ball milling tank and ball milling for 4 h, with the objective of obtaining a well-mixed powder. Finally, a specific quantity of the combined powder was heated to 550 °C for 2 h under Ar atmosphere with a heating rate of 5 °C/min calcine to obtain S-doped  $C_3N_4$ .

#### Synthesis of Co/ZnPc-S- $C_3N_4$

Initially, 60 mg of S- $C_3N_4$ , 3 mg of CoPc, and 2 mg of ZnPc were dispersed in 40 ml, 20 ml and 20 ml of DMF, respectively, and designated as Solution A, Solution B, and Solution C. Afterwards, solutions A, B, and C were sonicated for at least 30 min, respectively, so as to make the added materials well dispersed in the DMF. Subsequently, solution B and C were added to solution A and the mixture was

sonicated for at least 30 min. Finally, the sonicated mixture was stirred vigorously at room temperature for 48 hours and washed by centrifugation with ethanol and deionised water, and freeze-dried to obtain the Co-Zn heteronuclear diatomic catalysts Co/ZnPc-S-C<sub>3</sub>N<sub>4</sub>.

#### **Synthesis of CoPc-S-C<sub>3</sub>N<sub>4</sub> 、 ZnPc-S-C<sub>3</sub>N<sub>4</sub>**

Two control samples, including Co SAC CoPc-S-C<sub>3</sub>N<sub>4</sub> and Zn SAC ZnPc-S-C<sub>3</sub>N<sub>4</sub>, were prepared by the same procedure, except that only 5 mg of CoPc was added in the preparation of CoPc-S-C<sub>3</sub>N<sub>4</sub>, while only 5 mg of ZnPc was added in the preparation of ZnPc-S-C<sub>3</sub>N<sub>4</sub>.

### **1.3 Materials characterization**

Scanning electron microscope (SEM) images were obtained by Thermo Quattro S field emission environmental scanning electron microscope. Transmission electron microscopy (TEM) images were taken with a FEI Talos F200S field emission transmission electron microscope (200 kV). The atomic information and corresponding energy-dispersive X-ray spectrometer mapping (EDS-mapping) of Co/ZnPc-S-C<sub>3</sub>N<sub>4</sub> were characterized using an FEI Themis Z transmission electron microscope operated at 200 kV and equipped with double spherical aberration (Cs) correctors. The powder X-ray diffraction (XRD) was recorded at 4° min<sup>-1</sup> on a Rigaku D/Max-2550 V X-ray diffractometer with a Cu K $\alpha$  radiation target (40 KV, 40 mA). X-ray photoelectron spectroscopy (XPS) was collected using a Thermo Scientific K-Alpha XPS spectrometer. Raman spectra were performed using a LABRAM HR Evolution (785 nm). Ultraviolet-visible (UV-Vis) absorbance spectra were measured on a UV-1900i Spectrophotometer. The X-ray absorption spectroscopy (XAS) spectra were recorded in the transmission mode at the BL14W1 beamline of Shanghai Synchrotron Radiation Facility (SSRF).

### **1.4 O<sub>2</sub>-TPD measurements**

Weigh 100 mg of the sample in a reaction tube, warm up from room temperature to 290°C at 10°C min<sup>-1</sup> for drying pretreatment, purge with He air flow (50 mL min<sup>-1</sup>) for 1 h, cool down to 50°C, add 3% O<sub>2</sub>/He mixture (50 mL min<sup>-1</sup>) for 1 h to saturation, switch to He air flow (50 mL min<sup>-1</sup>) and purge for 1 h

to remove the weakly adsorbed O<sub>2</sub> on the surface, and finally desorb under He atmosphere at a warming rate of 10°C min<sup>-1</sup> to 290 °C. The surface was purged with He gas (50 mL min<sup>-1</sup>) for 1 h to remove the weakly adsorbed O<sub>2</sub>, and then finally desorbed at 290°C under He atmosphere with a heating rate of 10°C min<sup>-1</sup>, and the desorbed gases were detected by TCD.

### 1.5 Electrochemical measurements

All the electrochemical measurements were performed at room temperature using a three-electrode system equipped with an electrochemical workstation. Among them, the selectivity of H<sub>2</sub>O<sub>2</sub> was made on a CHI 760E electrochemical workstation, while all the test content of the H-type were performed with the biologic VSP-300 electrochemical workstation. A saturated Ag/AgCl electrode and a graphite rod were used as the reference and counter electrodes, respectively. A RRDE electrode with a glassy carbon electrode (0.2472 cm<sup>2</sup> area) and a platinum ring electrode (0.1856 cm<sup>2</sup> area) was used as the working electrode. The catalyst ink was prepared by dispersing 5 mg synthesized catalysts into 1950 μL of isopropanol and 50 μL 5.0 wt.% Nafion solution. Then the mixture was sonicated for at least 30 min to get homogeneous ink. Then aspirated 5μl drop of ink on the disk electrode and made it dry naturally. Linear scanning voltammetry (LSV) measurements were conducted in an O<sub>2</sub>-saturated 0.1M KOH or 0.1M K<sub>2</sub>SO<sub>4</sub> electrolyte. The measured potentials versus Ag/AgCl were converted to the reversible hydrogen electrode (RHE) according to the following equation:

$$E_{\text{RHE}} = E_{\text{Ag/AgCl}} + 0.0591 \times \text{pH} + 0.1989 \text{ V}$$

The linear scanning voltammetry (LSV) tests were measured with an RRDE device, and the rotational speed and scanning rate were controlled to be 1600rpm and 10 mV s<sup>-1</sup>, respectively. At the same time, a constant potential was applied to the Pt ring electrode as a means of monitoring the production of H<sub>2</sub>O<sub>2</sub> on the disk electrode. The calculation of H<sub>2</sub>O<sub>2</sub> selectivity and electron transfer (n) number follows the following two equations.

$$H_2O_2 (\%) = 200 \times \frac{\frac{I_r}{N}}{|I_d| + \frac{I_r}{N}}$$

$$n = 4 \times \frac{|I_d|}{|I_d| + \frac{I_r}{N}}$$

Where  $I_d$  is the disk current and  $I_r$  is the ring current; and  $N$  is the collection efficiency of the ring with a value of 0.33, which was determined by the  $[Fe(CN)_6]^{3-/4-}$  redox couple in 0.1 M KOH electrolyte with 10 mM  $K_3Fe(CN)_6$  (Figure S26).

### 1.6 Measurement of electrochemical active surface area (ECSA)

The ECSA was determined using the double-layer capacitance ( $C_{dl}$ ) method, which involves cyclic voltammetry (CV) measurements in the region of non-Faraday potentials. Specifically, CV curves were recorded in the region of 0.79 to 0.89 V vs Ag/AgCl at 10, 20, 40, 60, 80 and 100 mV s<sup>-1</sup> scan rates. The double-layer capacitance ( $C_{dl}$ ), which is linearly related to ECSA, was calculated by determining the slope value of  $(j_a - j_c)/2$  at 0.24 V vs Ag/AgCl versus scan rate (where  $j_a$  is the anodic current density and  $j_c$  is the cathodic current density). The capacitance current density was also plotted versus scan rate to obtain  $C_{dl}$ .

### 1.7 Turnover frequency (TOF) calculation for H<sub>2</sub>O<sub>2</sub> electrosynthesis

In our study, we used inductively coupled plasma mass spectrometry (ICP-MS) to estimate the active site densities for Co and Zn separately. We will calculate the TOF for the catalyst based on the number of Co and Zn active sites, following the relation:

The H<sub>2</sub>O<sub>2</sub> current density ( $J_{H_2O_2}$ ) was calculated by:

$$J_{H_2O_2} = J_{disk} \times FE$$

$$FE = \frac{\frac{S\%}{100}}{2 - \frac{S\%}{100}}$$

where  $J_{disk}$  is the disk current density, FE is the H<sub>2</sub>O<sub>2</sub> faradaic efficiency, S% is the H<sub>2</sub>O<sub>2</sub> selectivity. The kinetic current density ( $J_K$ ) was then calculated by:

$$\frac{1}{J_K} = \frac{1}{J_{H_2O_2}} - \frac{1}{J_D}$$

where  $J_D$  is the diffusion-limited current density (3.025 mA cm<sup>-2</sup> in 0.1 M KOH).

$$TOF = \frac{J_K}{2 \times F \times n_M}$$

Where  $F$  is the faraday constant (96,485 C mol<sup>-1</sup>),  $n_M$  is the number of active sites.

### 1.8 Determination and quantitation of H<sub>2</sub>O<sub>2</sub> using UV-vis

We used the Ce(SO<sub>4</sub>)<sub>2</sub> method to detect the H<sub>2</sub>O<sub>2</sub> concentration. Specifically, a certain amount of electrolyte from the electrolytic cell after 2e<sup>-</sup>-ORR was added to 5 mL of 0.4 mM Ce(SO<sub>4</sub>)<sub>2</sub> solution. After mixing well, the absorption spectrum of the above solution was tested using a UV-visible spectrophotometer and the absorption intensity at 320 nm was recorded. A series of standard Ce(SO<sub>4</sub>)<sub>2</sub> concentrations (0.04 mM, 0.08 mM, 0.12 mM, 0.16 mM, 0.20 mM, 0.24 mM, 0.28 mM, 0.32 mM, 0.36 mM, 0.40 mM ) were measured in the same way as in the above mentioned tests to construct a concentration-absorbance curve to accurately quantify H<sub>2</sub>O<sub>2</sub>.

### 1.9 Measurement of H<sub>2</sub>O<sub>2</sub> concentration

The operational yield of H<sub>2</sub>O<sub>2</sub> was carried out in a two-compartment three-electrode H-cell system partitioned by an anion-exchange membrane. The working electrode was prepared by drip-casting Co/ZnPc-S-C<sub>3</sub>N<sub>4</sub> ink onto 1.0 × 1.0 cm<sup>2</sup> carbon paper with a catalyst loading of 0.2 mg cm<sup>-2</sup>. Ag/AgCl and carbon rods were used as reference and counter electrodes, respectively. Then, after reacting for 10 minutes at different potentials, the H<sub>2</sub>O<sub>2</sub> yields tested at different potentials were quantified by the cerium sulphate titration method using the following reactions:

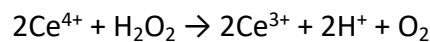

where yellow-colored Ce<sup>4+</sup> can be reduced by H<sub>2</sub>O<sub>2</sub> to colorless Ce<sup>3+</sup>, thus the yield of H<sub>2</sub>O<sub>2</sub> ( $\gamma_{H_2O_2}$ ) can be calculated by the consumption of Ce<sup>4+</sup> using the following equation:

$$C_{H_2O_2} = \frac{V_{Ce^{4+}} \times C_{Ce^{4+}_{before}} - (V_{Ce^{4+}} + V_{electrolyte}) \times C_{Ce^{4+}_{after}}}{2 \times V_{electrolyte}}$$

$$\gamma_{H_2O_2} = \frac{C_{H_2O_2} \times V}{t \times g}$$

where  $V_{Ce^{4+}}$  is the volume of added  $Ce(SO_4)_2$ ,  $C_{Ce^{4+}}^{before}$  and  $C_{Ce^{4+}}^{after}$  are the concentration of  $Ce^{4+}$  before and after reaction, respectively,  $V_{electrolyte}$  is the volume of injected electrolyte after reaction,  $C_{H_2O_2}$  is hydrogen peroxide concentration,  $V$  is the volume of electrolyte,  $t$  is reaction time,  $g$  is the mass of catalyst loading. The standard concentration-absorbance curve was obtained by linearly fitting the absorbance values at 320 nm for various known concentrations of  $Ce^{4+}$ . The faradaic efficiency (FE) value was calculated using the following equation:

$$FE (\%) = \left( 2 \times \frac{C \times V \times F}{Q} \right) \times 100\%$$

where  $F$  is the Faraday constant ( $96485 \text{ C mol}^{-1}$ );  $C$  is the concentration of generated  $H_2O_2$ ;  $V$  is the volume of electrolyte (10 mL); and  $Q$  is the passed charge during the electrolysis.

## 2.0 Measurement of $H_2O_2$ concentration

Electrosynthesis of  $H_2O_2$  via ORR was carried out using a flow cell in a two-compartment cell separated by a Nafion membrane. The formulated Co/ZnPc-S- $C_3N_4$  ink ( $2.5 \text{ mg mL}^{-1}$ ) was sprayed onto the surface of carbon paper (actual working area:  $1 \times 1 \text{ cm}^2$ ) with a catalyst loading of  $0.125 \text{ mg cm}^{-2}$  and form the cathode. Commercially available  $RuO_2$  was used as the anode, while an Ag/AgCl electrode was used as the reference electrode. In the flow cell test, 1M KOH, 1M  $K_2SO_4$  and 0.1M  $HClO_4$  were used to test the  $H_2O_2$  yield in different media. The electrolyte was circulated through peristaltic pumps at the cathode and anode. Meanwhile,  $O_2$  was passed through the gas chamber connected to the cathode at a rate of  $20 \text{ mL min}^{-1}$ .

## 2.1 Theoretical calculation

All density functional theory (DFT) calculations in this study were conducted using the Vienna Ab initio Simulation Package (VASP) within the framework of the generalized gradient approximation (GGA) employing the Perdew-Burke-Ernzerhof (PBE) functional<sup>1, 2</sup>. Ionic cores were described using the projected augmented wave

(PAW) potentials, while valence electrons were treated with a plane-wave basis set and a kinetic energy cutoff of 450 eV. Partial occupancies of Kohn–Sham orbitals were included using Gaussian smearing with a width of 0.05 eV. Geometric and lattice optimizations were performed with a Brillouin zone integration using  $1 \times 1 \times 1$   $\Gamma$ -centered  $k$ -point sampling<sup>3</sup>. The convergence criteria for self-consistent calculations were set to an energy threshold of  $10^{-5}$  eV, and equilibrium geometries were optimized until the maximum atomic force was below 0.02 eV/Å. To minimize interactions between periodic images, a 15 Å vacuum layer was introduced. Weak interactions were accounted for using the DFT+D<sub>3</sub> method with Grimme’s empirical correction. Spin polarization was incorporated to describe the magnetic system. Post-processing of input and output data, including charge difference analysis, was conducted using Vaspkit. Bader charge<sup>4</sup> analysis was also performed. To address the strong correlation effects of transition metals, structural optimizations and electronic structure calculations employed the spin-dependent GGA+U approach, with effective  $U_{\text{eff}}$  parameters were 3.32 eV for Co atom<sup>5</sup> and 6.0 eV for Zn atom<sup>6</sup>.



## 2. Supporting figures

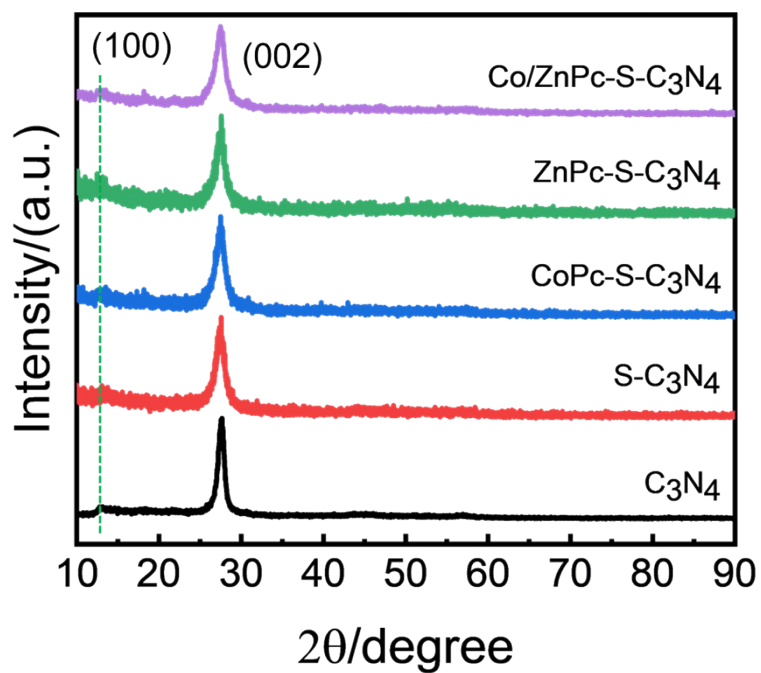

**Figure S1.** XRD patterns of Co/ZnPc-S-C<sub>3</sub>N<sub>4</sub>, CoPc-S-C<sub>3</sub>N<sub>4</sub>, ZnPc-S-C<sub>3</sub>N<sub>4</sub>, S-C<sub>3</sub>N<sub>4</sub> and C<sub>3</sub>N<sub>4</sub>, respectively.

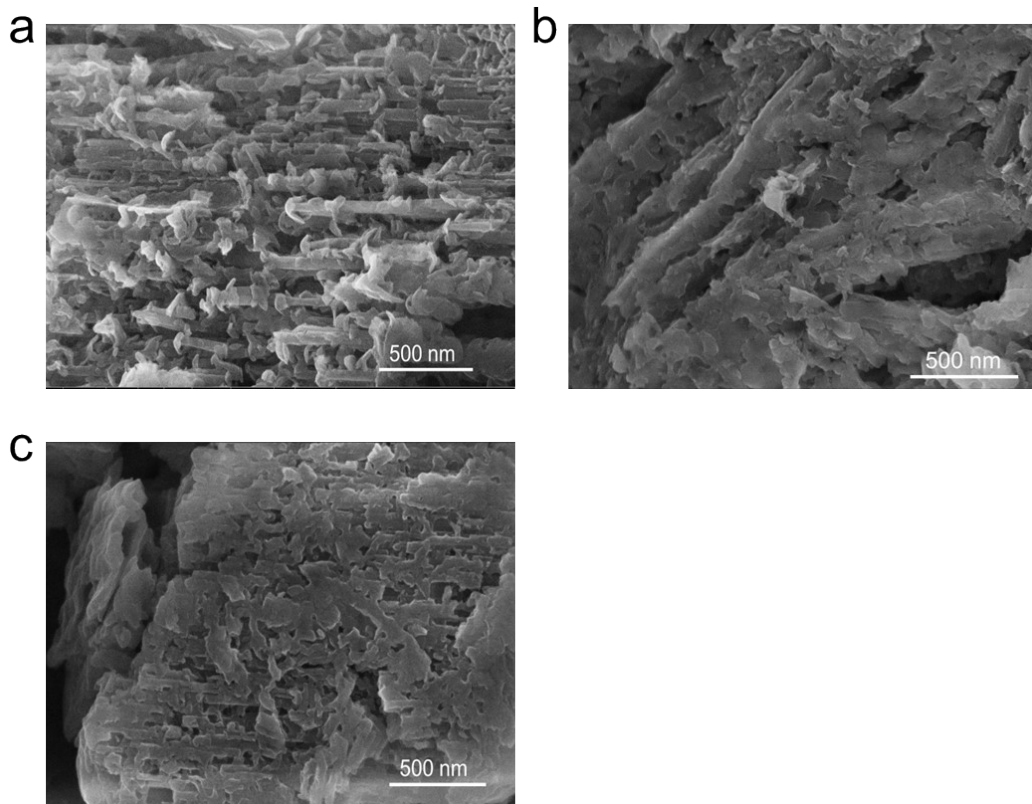

**Figure S2.** SEM images of (a)  $C_3N_4$ , (b)  $S-C_3N_4$ , (c)  $Co/ZnPc-S-C_3N_4$ .

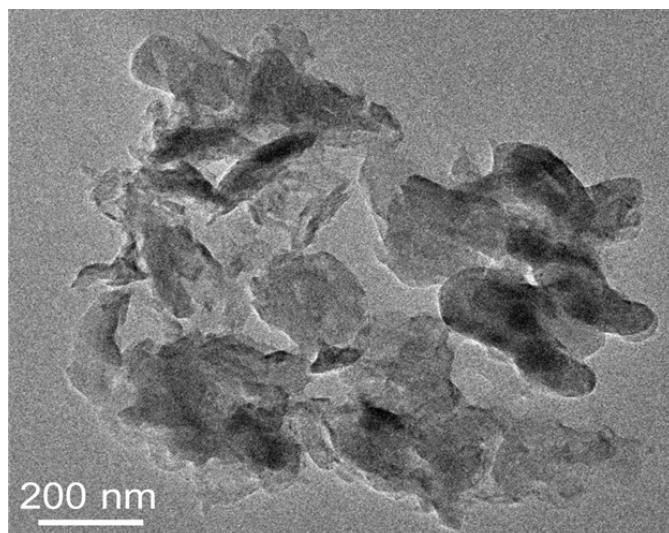

**Figure S3.** SEM image of Co/ZnPc-S-C<sub>3</sub>N<sub>4</sub>.

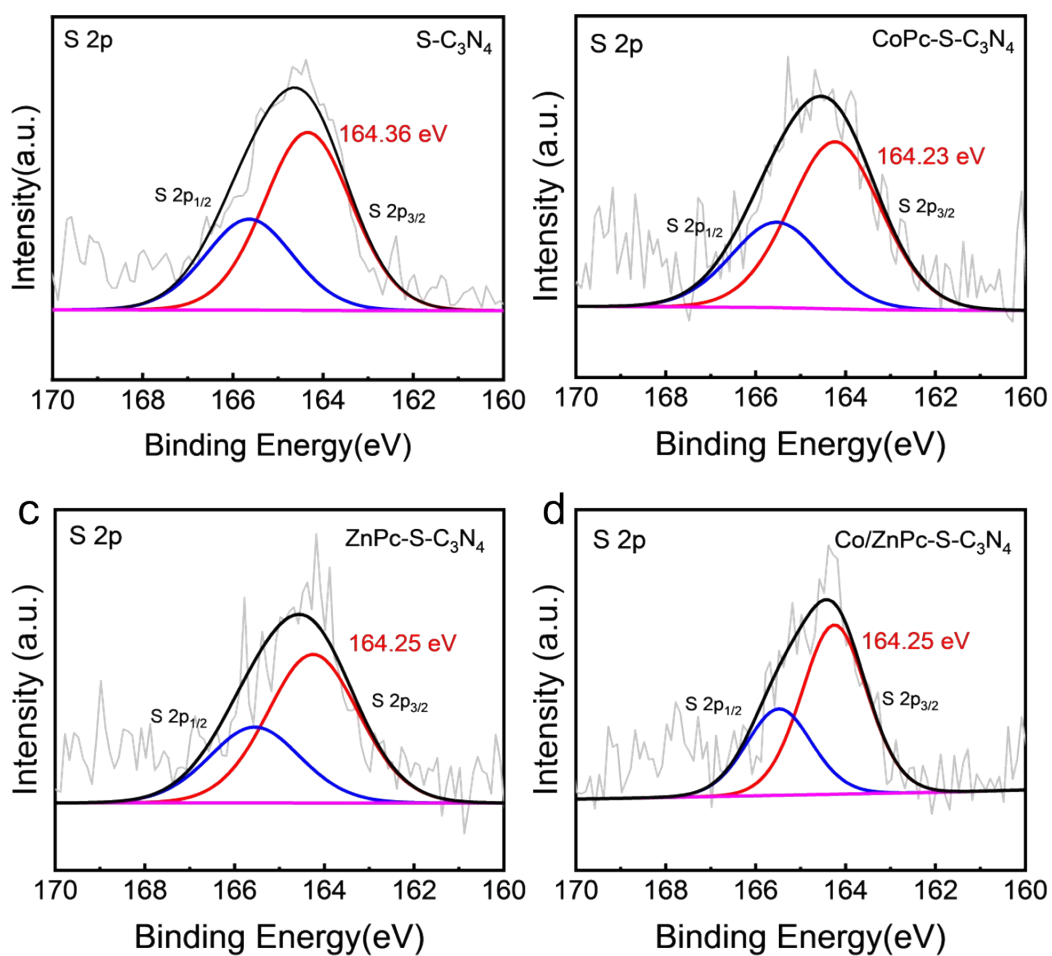

**Figure S4.** S 2p XPS spectra of (a) S-C<sub>3</sub>N<sub>4</sub>; (b) CoPc-S-C<sub>3</sub>N<sub>4</sub>; (c) ZnPc-S-C<sub>3</sub>N<sub>4</sub> and (d) Co/ZnPc-S-C<sub>3</sub>N<sub>4</sub>.

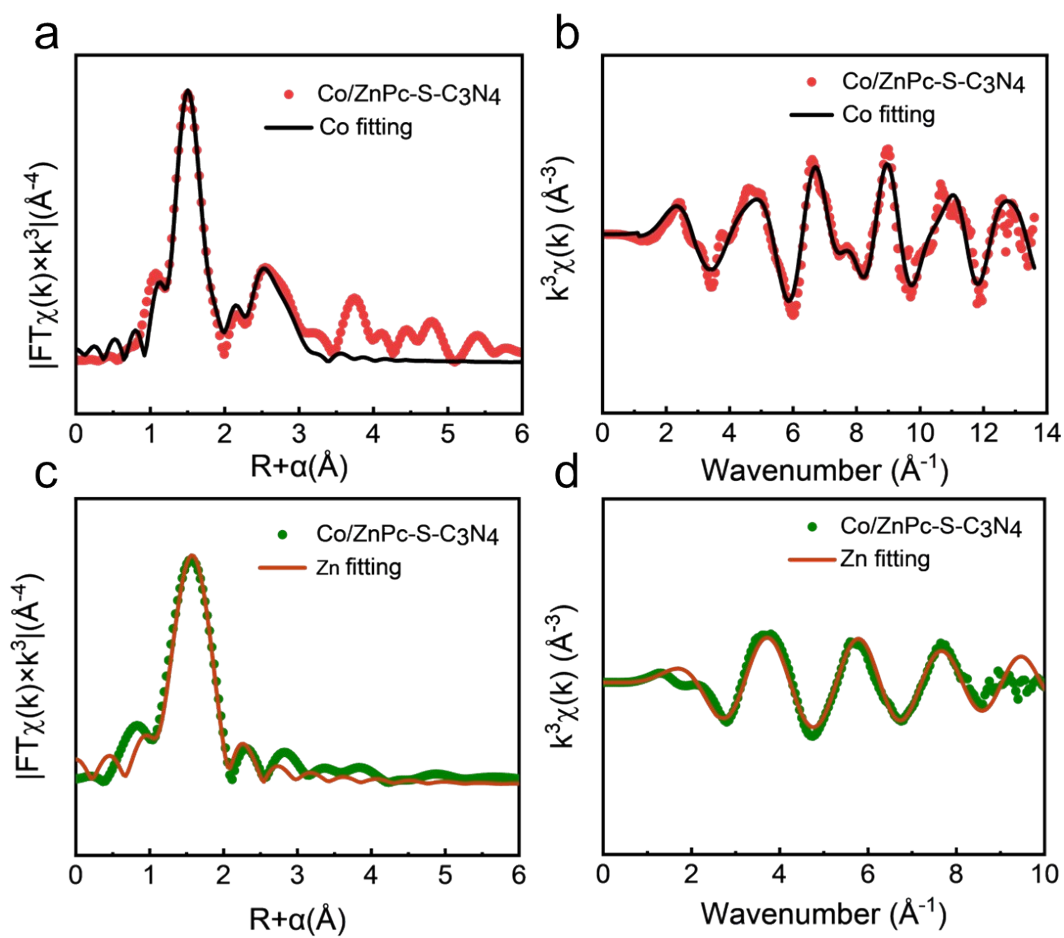

**Figure S5.** Fourier transform EXAFS spectra (a) and the corresponding curve-fitting results (c) of Co/ZnPc-S-C<sub>3</sub>N<sub>4</sub>. (b) Co and (d) Zn K-edge EXAFS fit about  $k^3$ -weighted  $k$ -space for Co/ZnPc-S-C<sub>3</sub>N<sub>4</sub>.

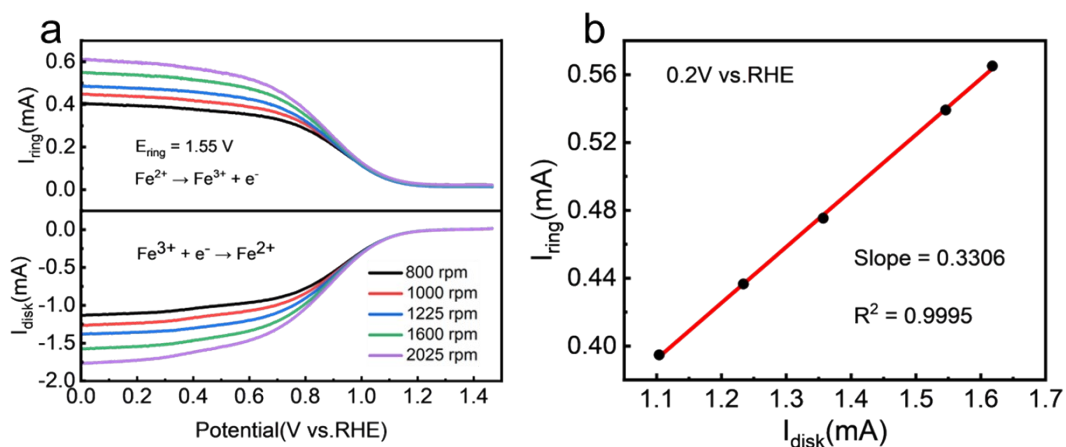

**Figure S6.** RRDE collection efficiency calibration (a) Linear sweep voltammetry curves recorded on bare glassy carbon rotation disk electrode with Pt ring in an N<sub>2</sub> saturated electrolyte with 0.1 M KOH+10 mM K<sub>3</sub>Fe(CN)<sub>6</sub>. Sweep rates: 20 mV/s, E<sub>ring</sub> = 1.55 V vs.RHE. (b) Linear fits of diffusion-limited current densities recorded at different rotational speeds on ring and disk electrodes. The experimentally determined apparent collection efficiency (N) of 0.33 is close to the theoretical value of 0.37.

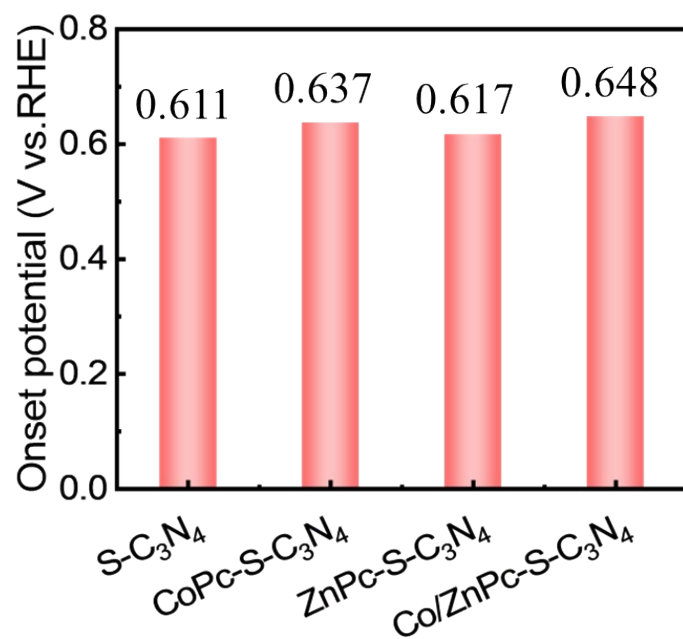

**Figure S7.** Histograms of the onset potential at current density of 1 mA cm<sup>-2</sup> in 0.1M KOH electrolyte.

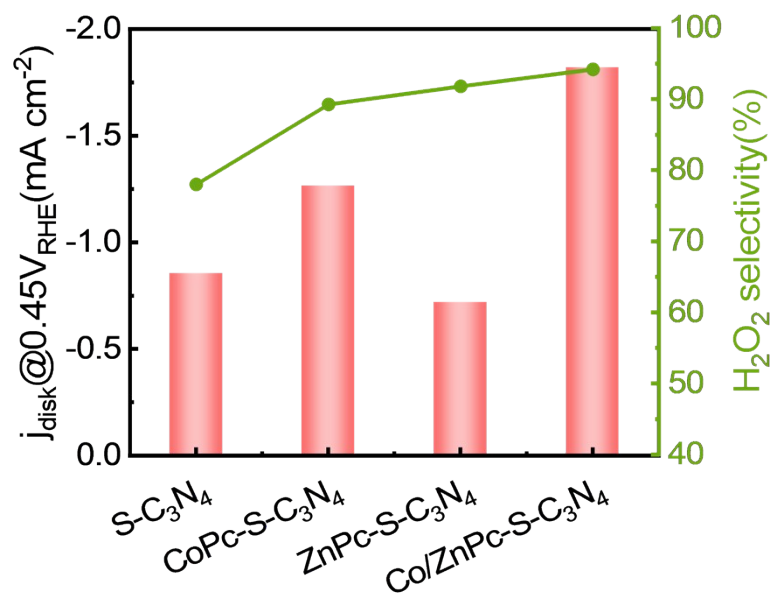

**Figure S8.** Relationship between current density, H<sub>2</sub>O<sub>2</sub> selectivity and loaded MPC in 0.1 M KOH electrolyte.



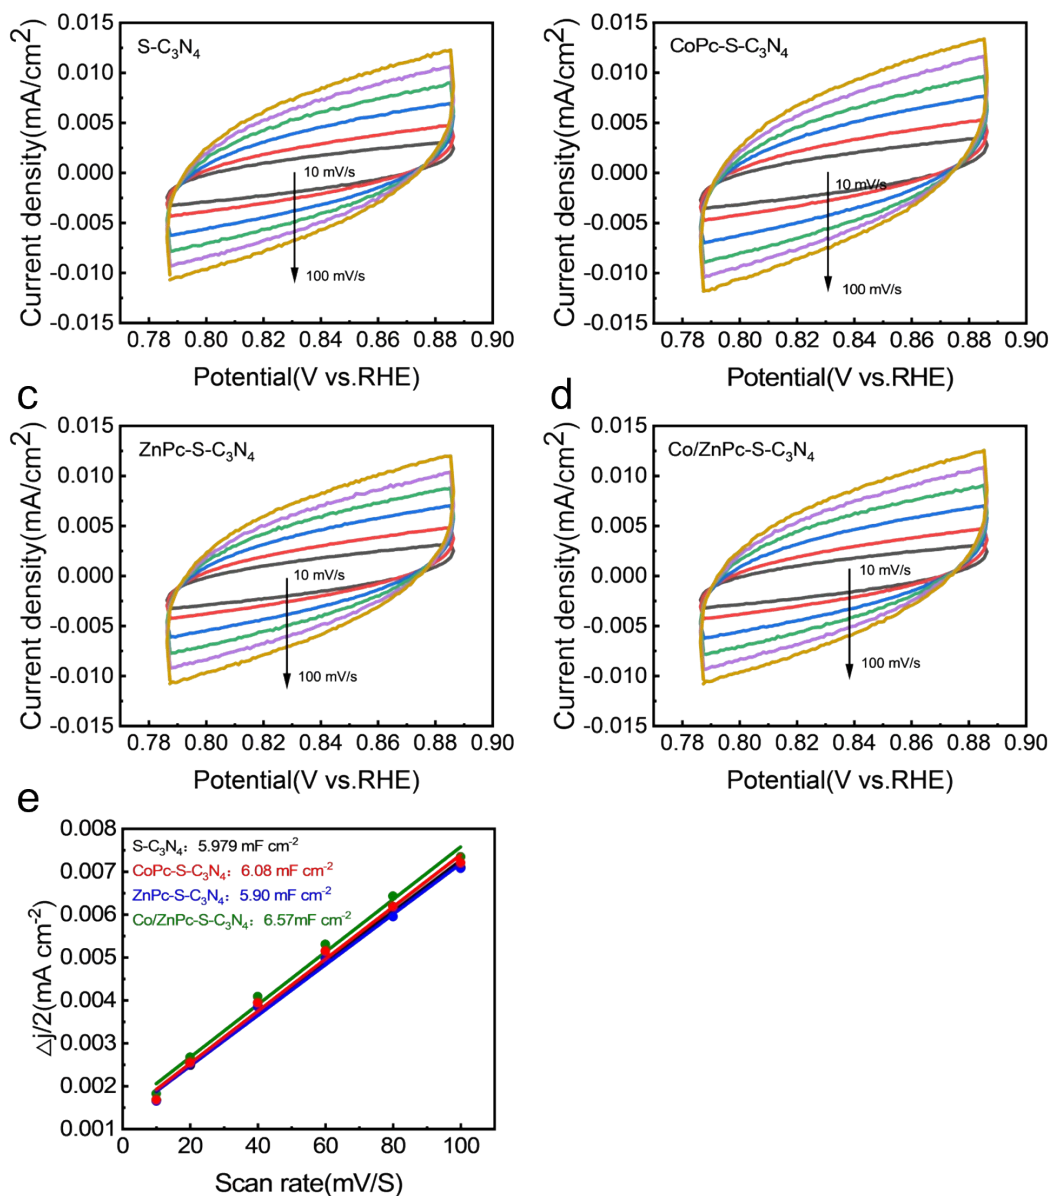

**Figure S9.** The ECSA was measured by double layer capacitance method. CV curves of (a) S-C<sub>3</sub>N<sub>4</sub>, (b) CoPc-S-C<sub>3</sub>N<sub>4</sub>, (c) ZnPc-S-C<sub>3</sub>N<sub>4</sub> and (d) Co/ZnPc-S-C<sub>3</sub>N<sub>4</sub> obtained in the capacitance region at scan rates of 10, 20, 40, 60, 80, and 100 mV/s in N<sub>2</sub>-saturated 0.1M KOH, (e) Material corresponding double layer capacitance.

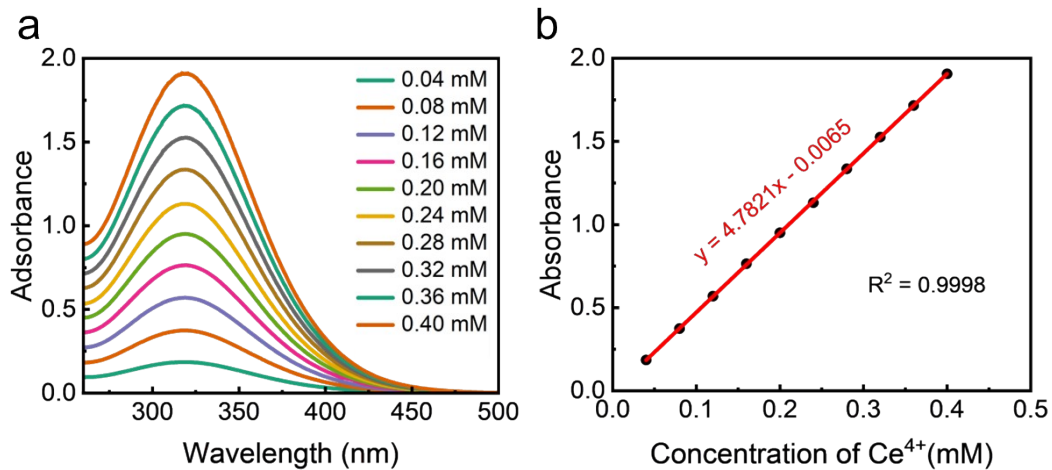

**Figure S10.** (a) UV-vis absorption spectra of Ce<sup>4+</sup> solution with various concentrations and (b) its corresponding standard curve.

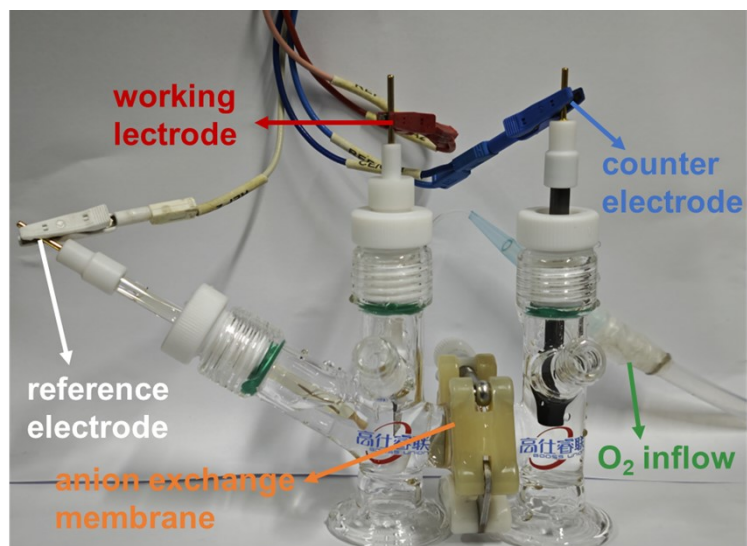

**Figure S11.** H-type cell installation diagram.

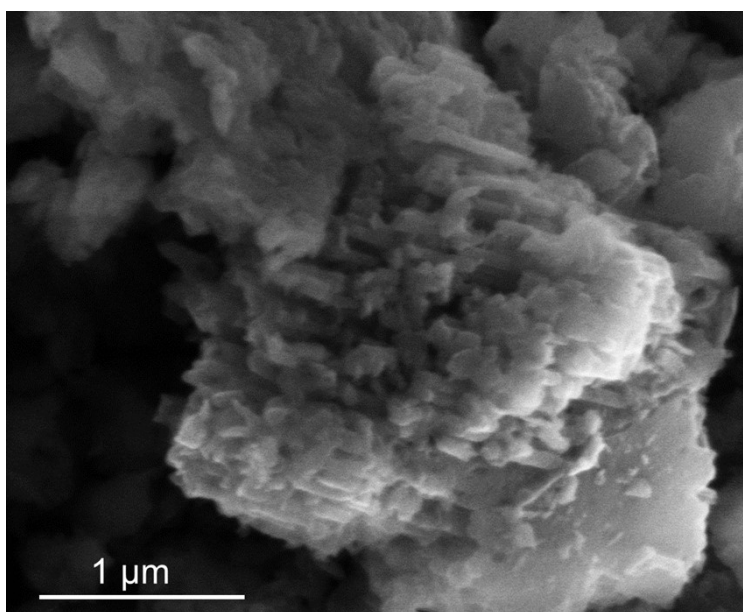

**Figure S12.** SEM image of Co/ZnPc-S-C<sub>3</sub>N<sub>4</sub> after the stability testing.

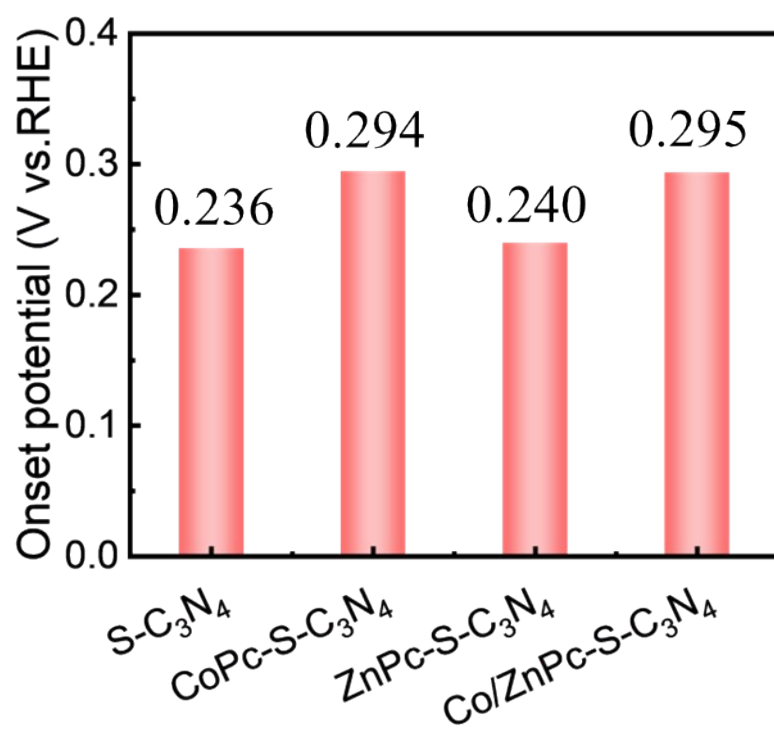

**Figure S13.** The onset potential at current density of 1 mA cm<sup>-2</sup> at 0.1M K<sub>2</sub>SO<sub>4</sub>

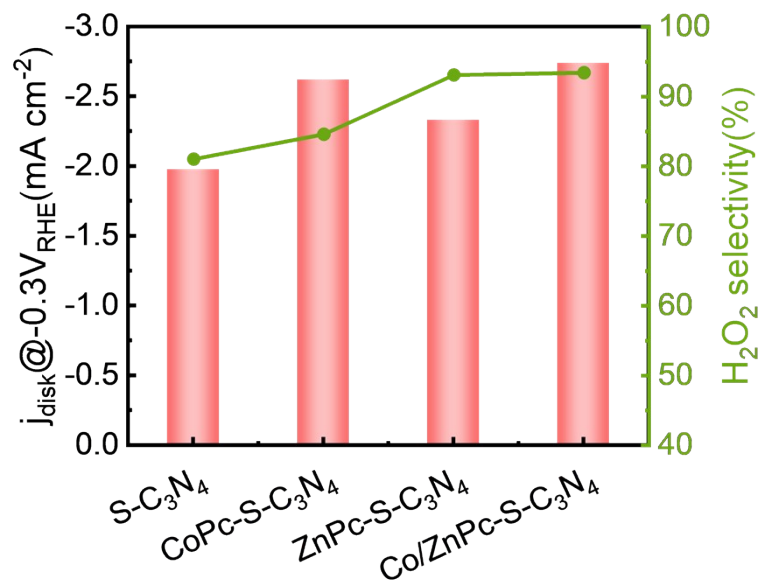

**Figure S14.** Relationship between current density, H<sub>2</sub>O<sub>2</sub> selectivity and loaded MPc in 0.1 M K<sub>2</sub>SO<sub>4</sub> electrolyte

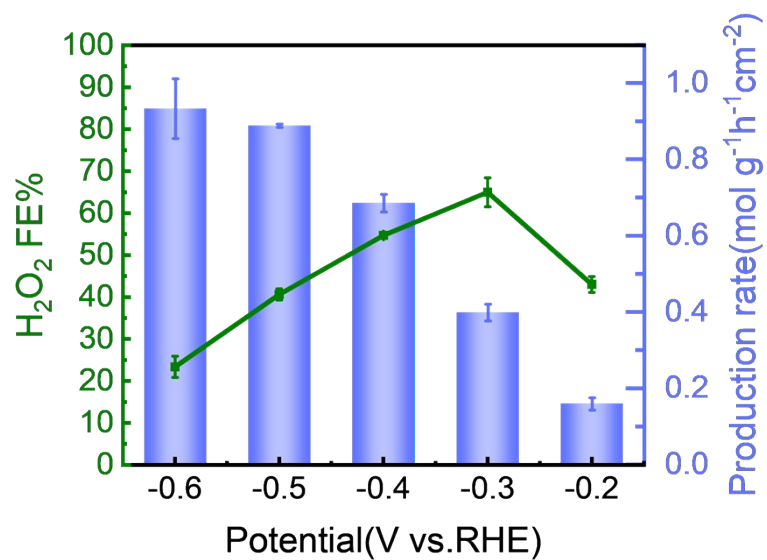

**Figure S15.** H<sub>2</sub>O<sub>2</sub> production rate and corresponding FE of Co/ZnPc-S-C<sub>3</sub>N<sub>4</sub> at different applied potentials in 0.1M HClO<sub>4</sub> electrolyte.

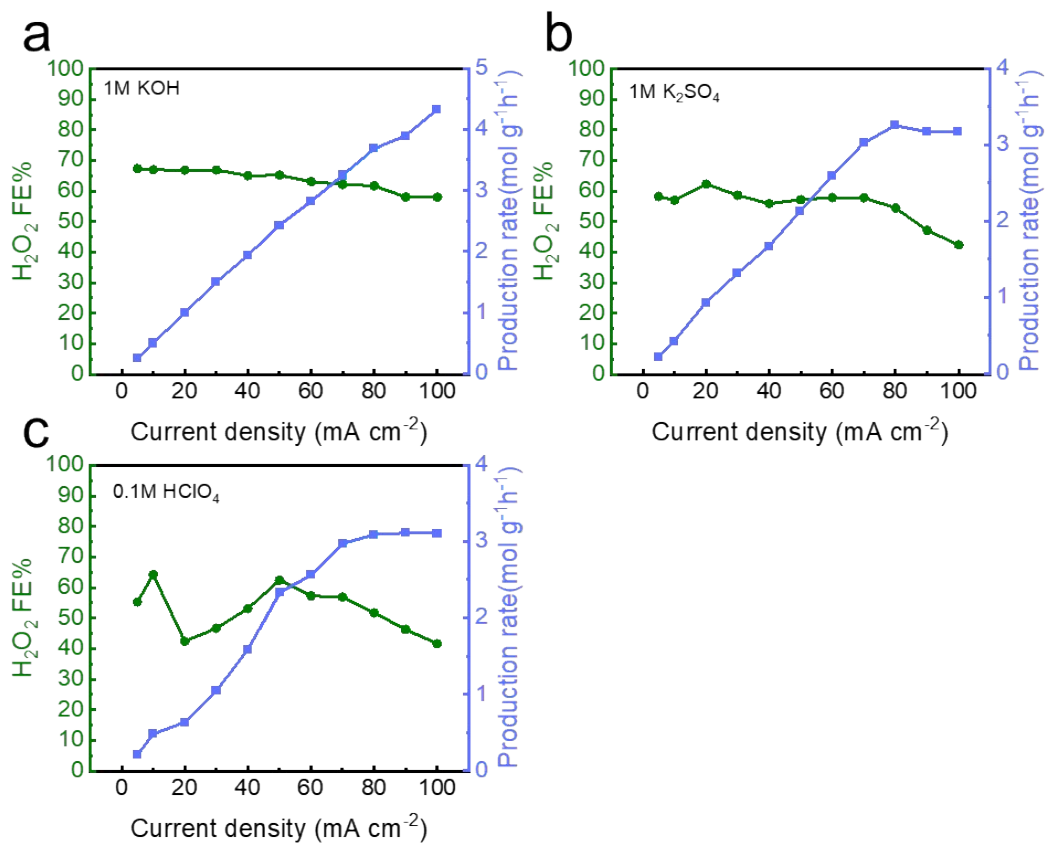

**Figure S16.** H<sub>2</sub>O<sub>2</sub> yields and corresponding FE for Co/ZnPc-S-C<sub>3</sub>N<sub>4</sub> at different current densities in (a) 1M KOH, (b) 1M K<sub>2</sub>SO<sub>4</sub>, and (c) 0.1M HClO<sub>4</sub> electrolytes.



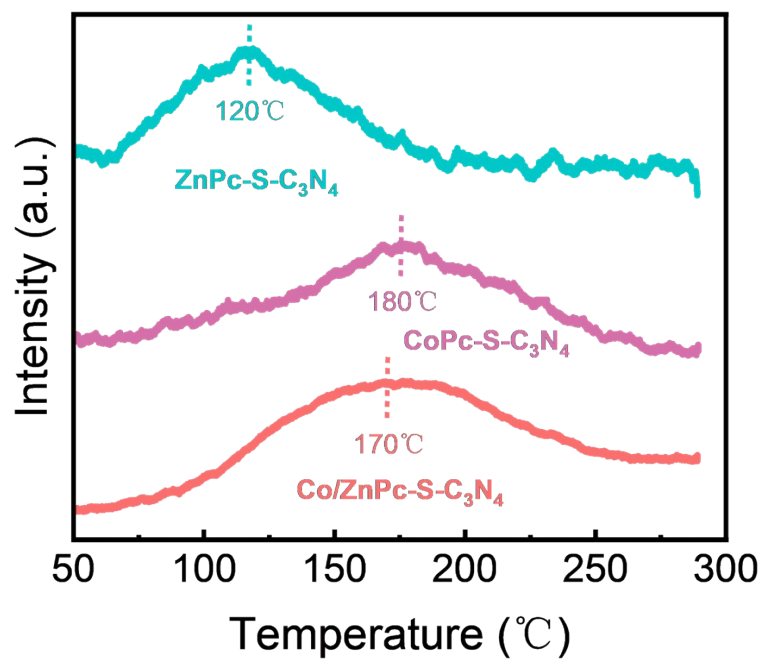

Figure S17. O<sub>2</sub>-TPD tests for the Co/ZnPc-S-C<sub>3</sub>N<sub>4</sub>, CoPc-S-C<sub>3</sub>N<sub>4</sub> and ZnPc-S-C<sub>3</sub>N<sub>4</sub>

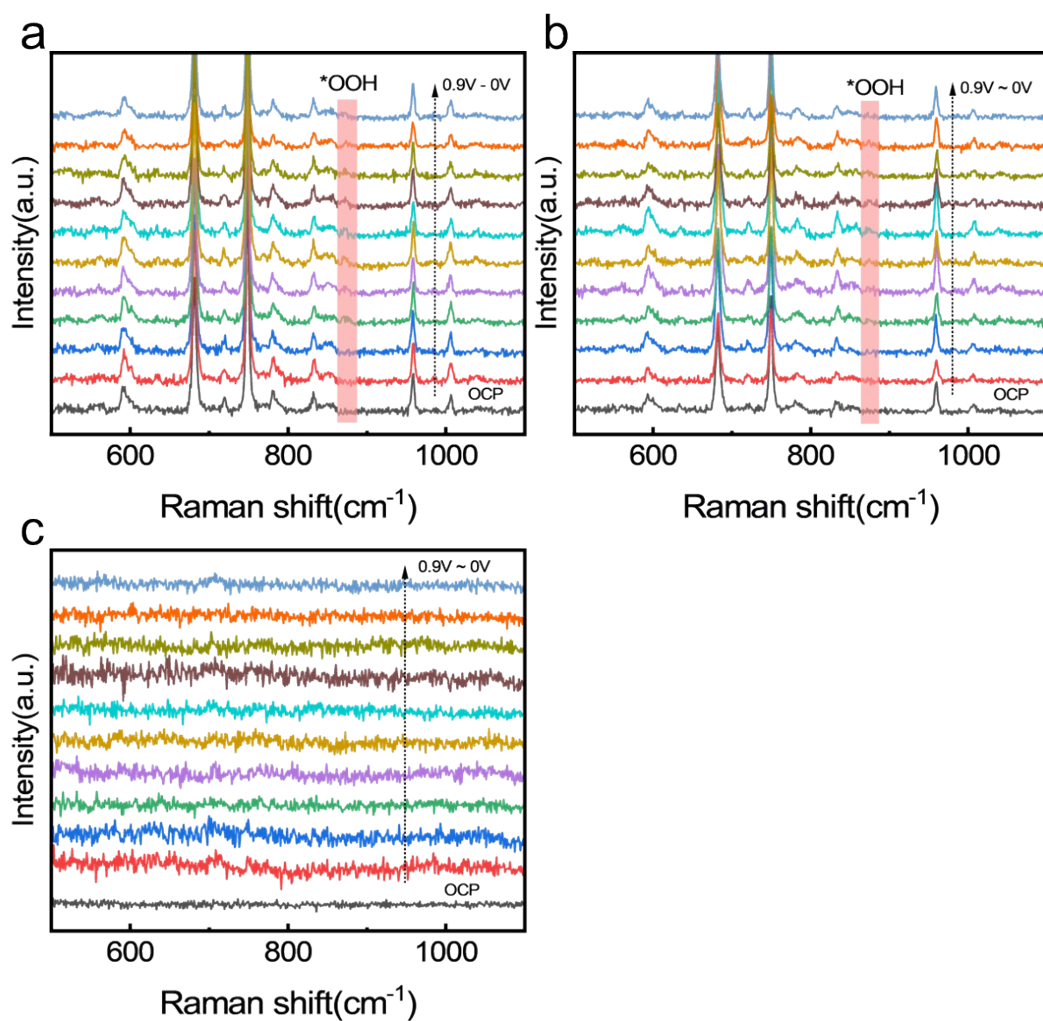

**Figure S18.** in situ Raman spectra of the  $2e^-$  ORR on (a) Co/ZnPc-S- $\text{C}_3\text{N}_4$ , (b) CoPc-S- $\text{C}_3\text{N}_4$  and (c) ZnPc-S- $\text{C}_3\text{N}_4$  surfaced in 0.1M KOH.

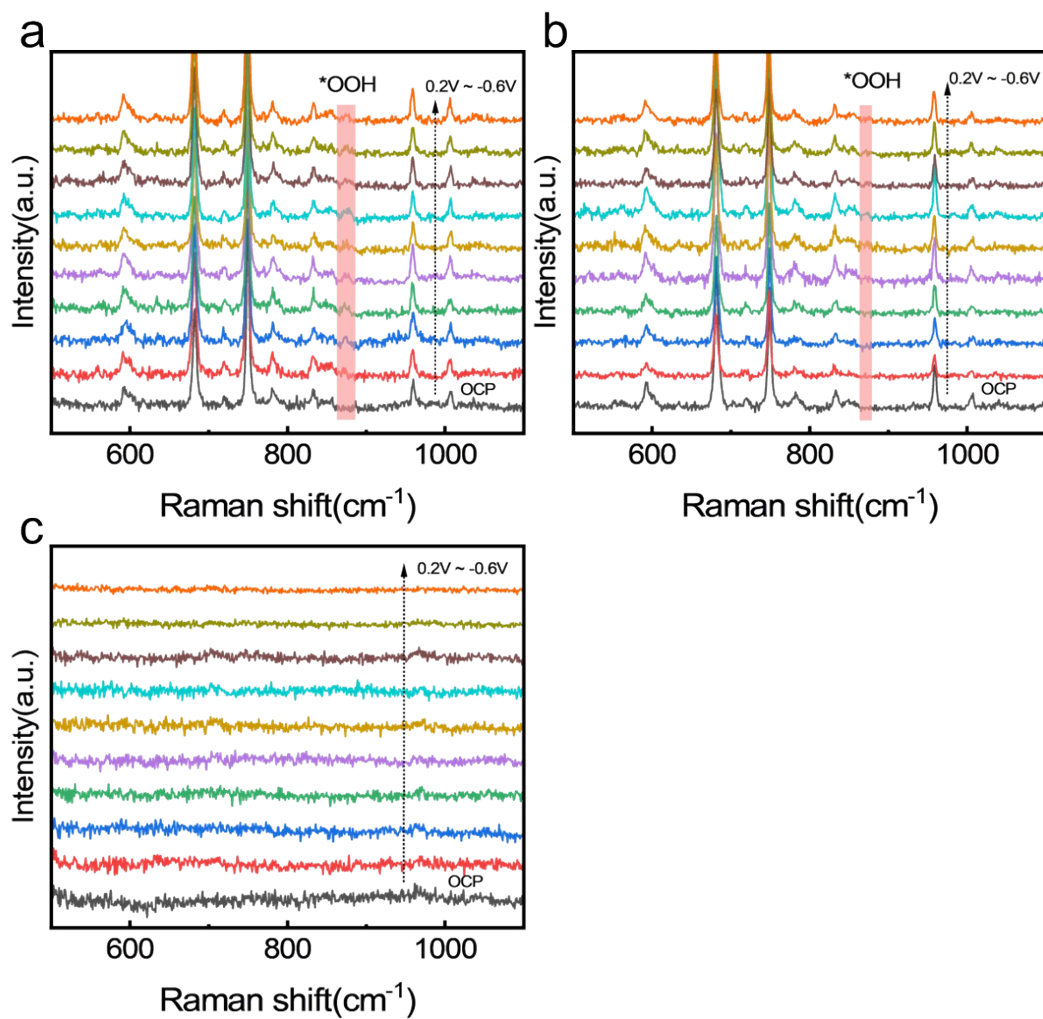

**Figure S19.** in situ Raman spectra of the  $2e^-$  ORR on (a) Co/ZnPc-S- $\text{C}_3\text{N}_4$ , (b) CoPc-S- $\text{C}_3\text{N}_4$  and (c) ZnPc-S- $\text{C}_3\text{N}_4$  surfaced in  $0.1\text{M K}_2\text{SO}_4$ .

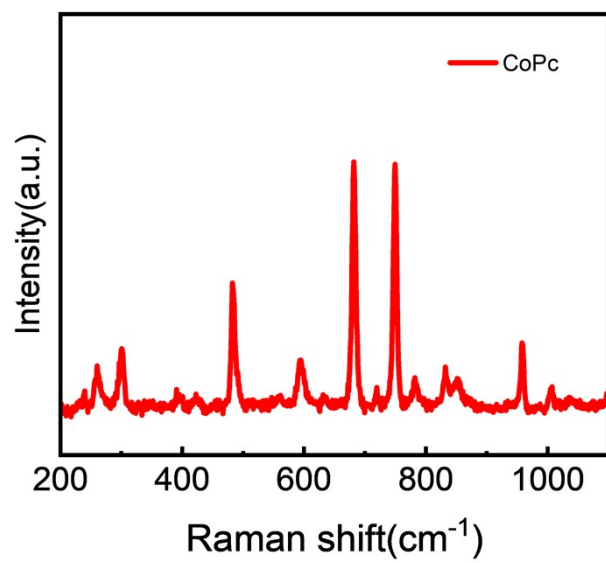

**Figure S20.** Raman spectrum of CoPc.

**Supplementary Table S1:** The EXAFS data fitting results of Co/ZnPc-S-C<sub>3</sub>N<sub>4</sub>.

| Samples                                      | Shell | CN <sup>a</sup> | R/Å <sup>b</sup> | $\sigma^2/\text{\AA}^2$ <sup>c</sup> | $\Delta E_0/\text{eV}$ <sup>d</sup> | R-factor |
|----------------------------------------------|-------|-----------------|------------------|--------------------------------------|-------------------------------------|----------|
| Co/ZnPc-S-C <sub>3</sub> N <sub>4</sub> (Co) | Co-N  | 4.1             | 1.90             | 0.0013                               | 5.0                                 | 0.0132   |
| Co/ZnPc-S-C <sub>3</sub> N <sub>4</sub> (Zn) | Zn-N  | 4.4             | 2.10             | 0.0052                               | 1.3                                 | 0.0096   |

**Supplementary Table S2: The concentrations and the calculated TOF of Co and Zn in CoPc-S-C<sub>3</sub>N<sub>4</sub>, ZnPc-S-C<sub>3</sub>N<sub>4</sub>, and Co/ZnPc-S-C<sub>3</sub>N<sub>4</sub> samples.**

Assuming that all metal centers are active sites, the TOF was obtained at a voltage of 0.3 V vs.RHE in an alkaline medium is as follows:

|                        | CoPc-S-C <sub>3</sub> N <sub>4</sub> | ZnPc-S-C <sub>3</sub> N <sub>4</sub> | Co/ZnPc-S-C <sub>3</sub> N <sub>4</sub> |          |
|------------------------|--------------------------------------|--------------------------------------|-----------------------------------------|----------|
| ICP                    | Co: 0.58%                            | Zn: 0.4%                             | Co: 0.37%                               | Zn: 0.2% |
| TOF (s <sup>-1</sup> ) | 7                                    | 6                                    | 20                                      | 40       |

**Supplementary Table S3:** Performance comparisons of Co/ZnPc-S-C<sub>3</sub>N<sub>4</sub> with previously reported electrocatalysts for 2e<sup>-</sup> ORR.

| Sample                                  | Electrolyte                          | Max H <sub>2</sub> O <sub>2</sub> yield rate (mol g <sub>cat</sub> <sup>-1</sup> h <sup>-1</sup> ) | Max FE (%) | Stability (h) | Cell setup | Tafel slopes mV dec <sup>-1</sup> | Reference |
|-----------------------------------------|--------------------------------------|----------------------------------------------------------------------------------------------------|------------|---------------|------------|-----------------------------------|-----------|
| Co/ZnPc-S-C <sub>3</sub> N <sub>4</sub> | 0.1M KOH                             | 5.35 mol g <sub>cat</sub> <sup>-1</sup> h <sup>-1</sup>                                            | ~100%      | 110           | H-cell     | 102                               | This work |
|                                         | 0.1M K <sub>2</sub> SO <sub>4</sub>  | 5.45 mol g <sub>cat</sub> <sup>-1</sup> h <sup>-1</sup>                                            | ~100%      | 85            | H-cell     | 117                               |           |
| FeSAs/ACs-BCC                           | 0.1 M KOH                            | 1.13 mol g <sub>cat</sub> <sup>-1</sup> h <sup>-1</sup>                                            | 87.8%      | -             | H-cell     | 73                                | 7         |
| CoZn <sub>SA</sub> @CNTs                | 0.1M KOH                             | 4.77 mol g <sub>cat</sub> <sup>-1</sup> h <sup>-1</sup>                                            | 95%        | 12            | H-cell     | 76.3                              | 8         |
| W1/NO-C                                 | 0.1M KOH                             | 1.23 mol g <sub>cat</sub> <sup>-1</sup> h <sup>-1</sup>                                            | 95%        | -             | H-cell     | 115                               | 9         |
| Ni-N <sub>2</sub> O <sub>2</sub> /C     | 0.1M KOH                             | 1.18 mol g <sub>cat</sub> <sup>-1</sup> h <sup>-1</sup>                                            | 97%        | 8             | Flow cell  | -                                 | 10        |
| ZnCo-ZIF-C <sub>3</sub>                 | 0.1M KOH                             | 4.3 mol g <sub>cat</sub> <sup>-1</sup> h <sup>-1</sup>                                             | 95%        | 120           | Flow cell  | 73.6                              | 11        |
| ZnCo-MTF                                | 0.1M KOH                             | 5.55 mol g <sub>cat</sub> <sup>-1</sup> h <sup>-1</sup>                                            | 93.1%      | 12            | Flow cell  | 95.4                              | 12        |
| Co-N-C                                  | 0.1M Na <sub>2</sub> SO <sub>4</sub> | 4.33 mol g <sub>cat</sub> <sup>-1</sup> h <sup>-1</sup>                                            | -          | 8             | Flow cell  | -                                 | 13        |
| ZnO@ZnO <sub>2</sub>                    | 0.1M K <sub>2</sub> SO <sub>4</sub>  | 5.47 mol g <sub>cat</sub> <sup>-1</sup> h <sup>-1</sup>                                            | 95.5%      | 12            | Flow cell  | -                                 | 14        |
| Co/NC                                   | 0.1M PBS                             | 3.57 mol g <sub>cat</sub> <sup>-1</sup> h <sup>-1</sup>                                            | 84.2%      | 10            | H-cell     | -                                 | 15        |
| PCMNS                                   | 0.1M K <sub>2</sub> SO <sub>4</sub>  | 1.1025 mol g <sub>cat</sub> <sup>-1</sup> h <sup>-1</sup>                                          | -          | 10            | H-cell     | 104                               | 16        |

## Reference

1. Kresse, G.; Furthmüller, J. *Mater. Sci.* 1996, **6**, 15–50.
2. Perdew, J. P.; Burke, K.; Ernzerhof, M. *Phys. Rev. Lett.* 1996, **77**, 3865–3868.
3. H. J. Monkhorst and J. D. Pack, *Physical Review B*, 1976, **13**, 5188-5192.
4. G. Henkelman, A. Arnaldsson and H. Jónsson, *Computational Materials Science*, 2006, **36**, 354-360.
5. E. Sanville, S. D. Kenny, R. Smith and G. Henkelman, *J Comput Chem*, 2007, **28**, 899-908.
6. M. B. Kanoun, S. Goumri-Said, U. Schwingenschlögl and A. Manchon, *Chemical Physics Letters*, 2012, **532**, 96-99.
7. H. Xu, S. Zhang, X. Zhang, M. Xu, M. Han, L. R. Zheng, Y. Zhang, G. Wang, H. Zhang and H. Zhao, *Angew Chem Int Ed Engl*, 2023, **62**, e202314414.
8. L. Yang, H. Cheng, H. Li, G. Sun, S. Liu, T. Ma and L. Zhang, *Adv Mater*, 2024, DOI: 10.1002/adma.202406957, e2406957.
9. F. Zhang, Y. Zhu, C. Tang, Y. Chen, B. Qian, Z. Hu, Y. C. Chang, C. W. Pao, Q. Lin, S. A. Kazemi, Y. Wang, L. Zhang, X. Zhang and H. Wang, *Advanced Functional Materials*, 2021, **32**.
10. Y. Wang, R. Shi, L. Shang, G. I. N. Waterhouse, J. Zhao, Q. Zhang, L. Gu and T. Zhang, *Angew Chem Int Ed Engl*, 2020, **59**, 13057-13062.
11. C. Zhang, L. Yuan, C. Liu, Z. Li, Y. Zou, X. Zhang, Y. Zhang, Z. Zhang, G. Wei and C. Yu, *J Am Chem Soc*, 2023, **145**, 7791-7799.
12. Z. M. Li, C. Q. Zhang, C. Liu, H. W. Zhang, H. Song, Z. Q. Zhang, G. F. Wei, X. J. Bao, C. Z. Yu and P. Yuan, *Angew Chem Int Ed Engl*, 2024, **63**, e202314266.
13. Y. Sun, L. Silvioli, N. R. Sahraie, W. Ju, J. Li, A. Zitolo, S. Li, A. Bagger, L. Arnarson, X. Wang, T. Moeller, D. Bernsmeier, J. Rossmeisl, F. Jaouen and P. Strasser, *J Am Chem Soc*, 2019, **141**, 12372-12381.
14. Y. Zhou, L. Xu, J. Wu, W. Zhu, T. He, H. Yang, H. Huang, T. Cheng, Y. Liu and Z. Kang, *Energy & Environmental Science*, 2023, **16**, 3526-3533.
15. H. Shen, N. Qiu, L. Yang, X. Guo, K. Zhang, T. Thomas, S. Du, Q. Zheng, J. P. Attfield, Y. Zhu and M. Yang, *Small*, 2022, **18**, e2200730.
16. R. Hu, Y. Cui, B. Huang and L. Guan, *ACS Appl Mater Interfaces*, 2021, **13**, 35856-35864.
